# Supplementary material for: Chlorogenic acids, sensory quality and their relationship in global Geisha coffees
Source: Research Square preprint supplement (doi:10.21203/rs.3.rs-7404158/v1), 2025-09-01
Supplement: Supplementary file 1 [file 14dc99512df6d69bc326ffb8.docx]

Table S1 The origin, processing method and cupping scores of Geisha coffee

| ID | Origin | Processing method | Clean cup | Sweet | Acidtty | Mouthfeel | Flavor | Aftertaste | Balance | Overall | Total |
| --- | --- | --- | --- | --- | --- | --- | --- | --- | --- | --- | --- |
| 1 | Panama | Nature | 6.2 | 6.4 | 6.4 | 6.2 | 6.4 | 6.3 | 6.2 | 6.3 | 86.6 |
| 2 | Panama | Anaerobic fermentation | 6.3 | 6.7 | 6.8 | 6.3 | 6.8 | 6.4 | 6.5 | 6.6 | 88.6 |
| 3 | Panama | Washed | 5.7 | 5.8 | 5.7 | 5.7 | 5.3 | 5.4 | 5.6 | 5.2 | 80.3 |
| 4 | Panama | Anaerobic fermentation | 6.1 | 6.5 | 6.5 | 6.5 | 6.6 | 6.4 | 6.3 | 6.5 | 87.4 |
| 5 | Panama | Washed | 6.6 | 6.5 | 6.6 | 6.5 | 6.7 | 6.4 | 6.6 | 6.4 | 88.2 |
| 6 | Panama | Anaerobic fermentation | 6.6 | 6.7 | 6.5 | 6.5 | 6.5 | 6.4 | 6.4 | 6.4 | 88.0 |
| 7 | Panama | Anaerobic fermentation | 6.6 | 6.9 | 6.7 | 6.6 | 6.8 | 6.7 | 6.6 | 6.8 | 89.6 |
| 8 | Ethiopia | Nature | 6.1 | 6.7 | 6.3 | 6.2 | 6.6 | 6.2 | 6.2 | 6.2 | 86.5 |
| 9 | Ethiopia | Nature | 6.2 | 6.8 | 6.3 | 6.3 | 6.7 | 6.0 | 6.3 | 6.5 | 87.1 |
| 10 | Ethiopia | Nature | 5.6 | 6.5 | 6.5 | 5.9 | 6.0 | 5.6 | 5.6 | 6.0 | 83.8 |
| 11 | Colombia | Anaerobic fermentation | 6.3 | 6.5 | 6.5 | 6.1 | 6.8 | 6.6 | 6.4 | 6.2 | 87.4 |
| 12 | Costa Rica | Honey | 6.2 | 6.5 | 6.5 | 5.9 | 5.8 | 6.0 | 6.0 | 6.0 | 84.9 |
| 13 | Costa Rica | Honey | 5.8 | 6.5 | 6.4 | 6.1 | 6.2 | 6.2 | 6.0 | 6.1 | 85.3 |
| 14 | Costa Rica | Honey | 6.4 | 6.3 | 6.3 | 6.3 | 6.5 | 6.2 | 6.0 | 6.3 | 86.3 |
| 15 | Peru | Nature | 5.0 | 5.7 | 5.5 | 5.8 | 5.0 | 5.4 | 5.4 | 5.0 | 78.8 |
| 16 | Peru | Nature | 6.3 | 6.5 | 6.7 | 6.1 | 6.7 | 6.4 | 6.4 | 6.4 | 87.6 |
| 17 | Guatemala | Nature | 6.0 | 6.3 | 6.3 | 6.2 | 6.1 | 6.2 | 6.1 | 5.8 | 84.9 |
| 18 | China | Honey | 5.4 | 5.9 | 5.8 | 5.8 | 5.4 | 5.3 | 5.5 | 5.2 | 80.3 |
| 19 | Brazil | Nature | 5.9 | 6.1 | 6.0 | 5.6 | 5.5 | 5.4 | 5.7 | 5.3 | 81.6 |
| 20 | Brazil | Nature | 6.1 | 6.1 | 6.1 | 5.7 | 5.6 | 5.5 | 5.7 | 5.4 | 82.1 |
| 21 | Honduras | Anaerobic fermentation | 6.5 | 6.8 | 6.6 | 6.6 | 6.8 | 6.7 | 6.5 | 6.5 | 89.0 |
| 22 | Honduras | Washed | 5.4 | 6.0 | 5.5 | 5.9 | 5.5 | 5.5 | 5.6 | 5.6 | 81.0 |
| 23 | Ecuador | Anaerobic fermentation | 6.4 | 6.8 | 6.6 | 6.4 | 6.6 | 6.3 | 6.5 | 6.4 | 88.0 |
| 24 | Mexico | Honey | 5.9 | 6.3 | 6.3 | 5.9 | 6.3 | 6.2 | 6.1 | 6.0 | 84.9 |
| 25 | Bolivia | Nature | 6.0 | 6.3 | 6.3 | 6.1 | 6.3 | 6.1 | 6.1 | 6.2 | 85.5 |
| 26 | El Salvador | Nature | 5.6 | 6.1 | 5.9 | 5.9 | 5.7 | 5.8 | 5.7 | 5.7 | 82.5 |
| 27 | Indonesia | Washed | 5.6 | 5.9 | 5.6 | 5.6 | 5.5 | 5.7 | 5.8 | 5.5 | 81.2 |

Table S2 The chlorogenic acids content of green Geisha coffee beans (mg/g)

| Green coffee | 3,4-diCQA | 3,5-diCQA | 4,5-diCQA | 5-CQA | 3-CQA | 4-CQA | 5-FQA |
| --- | --- | --- | --- | --- | --- | --- | --- |
| 1 | 3.42±0.05 | 6.34±0.03 | 3.55±0.09 | 47.88±0.24 | 5.41±0.01 | 7.69±0.01 | 5.17±0.05 |
| 2 | 1.49±0.10 | 4.09±0.43 | 1.28±0.05 | 35.32±0.32 | 3.13±0.18 | 4.23±0.24 | 3.96±1.02 |
| 3 | 1.86±0.12 | 4.71±0.24 | 1.94±0.12 | 39.13±2.63 | 4.73±0.24 | 6.22±0.32 | 3.99±0.46 |
| 4 | 3.46±0.20 | 6.62±0.34 | 3.88±0.22 | 44.50±0.30 | 5.77±0.08 | 6.93±0.09 | 4.11±0.79 |
| 5 | 0.79±0.13 | 3.25±0.28 | 0.51±0.09 | 29.72±3.03 | 2.97±0.29 | 4.36±0.43 | 2.74±0.24 |
| 6 | 5.38±0.72 | 9.10±1.20 | 5.01±0.66 | 36.52±0.83 | 4.51±0.21 | 5.91±1.27 | 6.25±1.44 |
| 7 | 3.10±0.22 | 4.75±0.17 | 3.63±0.26 | 33.37±0.81 | 4.65±0.05 | 6.63±0.07 | 3.61±0.08 |
| 8 | 2.13±0.11 | 4.35±0.27 | 2.15±0.11 | 41.09±1.10 | 4.09±0.09 | 5.43±0.12 | 4.00±0.12 |
| 9 | 2.29±0.04 | 4.38±0.04 | 2.06±0.04 | 43.73±0.27 | 3.19±0.04 | 4.37±0.06 | 3.92±0.02 |
| 10 | 2.13±0.03 | 4.00±0.12 | 1.95±0.07 | 44.71±0.68 | 3.13±0.06 | 4.14±0.08 | 3.98±0.13 |
| 11 | 3.54±0.31 | 7.42±0.47 | 4.21±0.18 | 40.38±2.76 | 4.88±0.25 | 6.67±0.34 | 5.62±0.34 |
| 12 | 2.51±0.12 | 6.49±0.27 | 2.68±0.17 | 46.74±1.15 | 4.02±0.13 | 5.26±0.17 | 4.49±0.14 |
| 13 | 4.09±0.01 | 8.76±0.11 | 3.93±0.05 | 59.15±1.26 | 5.43±0.13 | 6.67±0.16 | 5.03±0.78 |
| 14 | 1.55±0.03 | 4.41±0.16 | 1.59±0.13 | 32.20±0.16 | 2.74±0.02 | 3.81±0.03 | 3.35±0.07 |
| 15 | 4.69±0.07 | 4.56±0.22 | 4.29±0.14 | 31.25±0.98 | 6.39±0.19 | 8.58±0.25 | 3.60±0.11 |
| 16 | 2.54±0.03 | 5.62±0.05 | 2.48±0.02 | 49.75±1.14 | 4.94±0.07 | 7.86±0.11 | 4.54±0.99 |
| 17 | 2.23±0.13 | 4.87±0.22 | 2.90±0.13 | 37.18±1.49 | 3.73±0.06 | 4.87±0.08 | 3.42±0.10 |
| 18 | 2.93±0.37 | 8.66±1.17 | 4.22±0.07 | 65.30±5.70 | 6.58±0.72 | 8.79±0.96 | 8.94±2.75 |
| 19 | 4.72±0.34 | 7.45±0.47 | 4.38±0.25 | 46.05±2.81 | 6.31±0.86 | 8.45±1.15 | 6.29±0.93 |
| 20 | 2.59±0.19 | 4.61±0.32 | 2.45±0.28 | 46.09±4.42 | 5.48±0.42 | 8.11±0.62 | 5.34±0.70 |
| 21 | 1.54±0.31 | 5.16±0.71 | 1.35±0.31 | 31.57±3.36 | 3.51±0.41 | 4.74±0.56 | 3.82±0.39 |
| 22 | 3.47±0.22 | 4.69±0.41 | 4.14±0.23 | 46.78±3.07 | 6.60±0.41 | 8.90±0.56 | 4.67±0.39 |
| 23 | 2.24±0.11 | 4.81±0.35 | 2.36±0.15 | 32.36±1.04 | 5.30±0.17 | 7.12±0.22 | 3.98±0.22 |
| 24 | 2.33±0.13 | 4.94±0.08 | 2.28±0.10 | 32.71±0.34 | 4.79±0.04 | 7.49±0.07 | 3.71±0.10 |
| 25 | 2.48±0.12 | 3.20±0.24 | 1.82±0.23 | 29.74±2.84 | 4.60±0.44 | 6.44±0.62 | 2.53±0.96 |
| 26 | 5.60±0.29 | 7.94±0.40 | 6.84±0.19 | 54.59±3.55 | 7.15±0.49 | 9.38±0.64 | 5.80±0.45 |
| 27 | 5.54±0.44 | 6.83±0.45 | 6.58±0.27 | 64.32±4.77 | 9.14±1.12 | 12.41±0.53 | 8.76±0.91 |

Table S3 The chlorogenic acids content of roasted Geisha coffee beans (mg/g)

| Roasted coffee | 3,4-diCQA | 3,5-diCQA | 4,5-diCQA | 5-CQA | 3-CQA | 4-CQA | 5-FQA |
| --- | --- | --- | --- | --- | --- | --- | --- |
| 1 | 0.54± 0.02 | 1.29± 0.05 | 1.72± 0.06 | 13.69± 0.48 | 2.99± 0.11 | 6.88± 0.24 | 1.27± 0.04 |
| 2 | 0.48± 0.02 | 1.15± 0.04 | 1.46± 0.05 | 14.93± 0.51 | 2.99± 0.10 | 6.97± 0.24 | 1.11± 0.04 |
| 3 | 0.63± 0.02 | 1.27± 0.05 | 1.60± 0.06 | 12.85± 0.48 | 2.77± 0.10 | 6.41± 0.24 | 1.19± 0.04 |
| 4 | 0.61± 0.02 | 1.19± 0.05 | 1.39± 0.05 | 12.80± 0.49 | 2.73± 0.10 | 6.32± 0.24 | 1.16± 0.04 |
| 5 | 0.58± 0.02 | 1.14± 0.04 | 1.37± 0.05 | 14.92± 0.50 | 3.21± 0.11 | 7.37± 0.25 | 1.13± 0.04 |
| 6 | 0.53± 0.02 | 1.27± 0.05 | 1.61± 0.06 | 13.30± 0.48 | 2.88± 0.10 | 6.65± 0.24 | 1.20± 0.04 |
| 7 | 0.49± 0.02 | 1.24± 0.04 | 1.61± 0.05 | 14.75± 0.50 | 3.16± 0.11 | 7.29± 0.25 | 1.14± 0.04 |
| 8 | 0.54± 0.02 | 1.41± 0.05 | 1.84± 0.06 | 14.86± 0.49 | 3.19± 0.10 | 7.33± 0.24 | 1.31± 0.04 |
| 9 | 0.65± 0.02 | 1.55± 0.05 | 1.54± 0.05 | 14.20± 0.48 | 3.05± 0.10 | 7.02± 0.24 | 1.59± 0.05 |
| 10 | 0.64± 0.03 | 1.48± 0.06 | 1.35± 0.06 | 10.65± 0.45 | 2.38± 0.10 | 5.47± 0.23 | 1.56± 0.07 |
| 11 | 0.56± 0.02 | 1.44± 0.06 | 1.86± 0.07 | 11.68± 0.46 | 2.62± 0.10 | 6.08± 0.24 | 1.16± 0.05 |
| 12 | 0.37± 0.01 | 1.09± 0.04 | 1.67± 0.06 | 15.08± 0.50 | 3.28± 0.11 | 7.47± 0.25 | 0.91± 0.03 |
| 13 | 0.40± 0.02 | 1.05± 0.04 | 1.36± 0.06 | 11.78± 0.49 | 2.64± 0.11 | 6.04± 0.25 | 0.97± 0.04 |
| 14 | 0.58± 0.02 | 1.21± 0.05 | 1.53± 0.06 | 12.06± 0.48 | 2.67± 0.11 | 6.08± 0.24 | 1.08± 0.04 |
| 15 | 0.67± 0.03 | 1.64± 0.07 | 1.85± 0.07 | 10.80± 0.43 | 2.57± 0.10 | 5.94± 0.24 | 1.41± 0.06 |
| 16 | 0.45± 0.01 | 1.21± 0.04 | 1.71± 0.06 | 14.73± 0.49 | 3.35± 0.11 | 7.56± 0.25 | 1.00± 0.03 |
| 17 | 0.42± 0.02 | 1.02± 0.04 | 1.58± 0.06 | 13.65± 0.50 | 2.83± 0.10 | 6.59± 0.24 | 0.97± 0.04 |
| 18 | 0.45± 0.02 | 1.25± 0.05 | 1.97± 0.08 | 11.74± 0.47 | 2.69± 0.11 | 6.16± 0.24 | 0.91± 0.04 |
| 19 | 0.59± 0.02 | 1.45± 0.06 | 2.00± 0.08 | 11.85± 0.46 | 2.59± 0.10 | 6.03± 0.23 | 1.20± 0.05 |
| 20 | 0.62± 0.02 | 1.57± 0.05 | 2.17± 0.07 | 14.94± 0.48 | 3.15± 0.10 | 7.35± 0.24 | 1.22± 0.04 |
| 21 | 0.64± 0.02 | 1.27± 0.05 | 1.25± 0.05 | 13.09± 0.48 | 2.96± 0.11 | 6.76± 0.25 | 1.21± 0.04 |
| 22 | 0.61± 0.02 | 1.40± 0.05 | 1.81± 0.06 | 14.29± 0.48 | 3.16± 0.11 | 7.33± 0.25 | 1.18± 0.04 |
| 23 | 0.51± 0.02 | 1.25± 0.04 | 1.65± 0.06 | 13.63± 0.49 | 2.93± 0.10 | 6.82± 0.24 | 1.18± 0.04 |
| 24 | 0.52± 0.02 | 1.29± 0.05 | 1.59± 0.06 | 12.70± 0.47 | 3.01± 0.11 | 6.89± 0.25 | 1.16± 0.04 |
| 25 | 0.49± 0.02 | 1.32± 0.05 | 1.73± 0.06 | 14.07± 0.48 | 3.12± 0.11 | 7.20± 0.25 | 1.17± 0.04 |
| 26 | 0.54± 0.02 | 1.34± 0.04 | 1.66± 0.05 | 14.78± 0.49 | 3.19± 0.11 | 7.36± 0.24 | 1.34± 0.04 |
| 27 | 0.56± 0.02 | 1.61± 0.05 | 2.22± 0.07 | 13.22± 0.45 | 3.26± 0.11 | 7.45± 0.25 | 1.32± 0.04 |

Table S3 The degradation of chlorogenic acids after light roasting

| Degradation | 3,4-diCQA | 3,5-diCQA | 4,5-diCQA | 5-CQA | 3-CQA | 4-CQA | 5-FQA | Total |
| --- | --- | --- | --- | --- | --- | --- | --- | --- |
| 1 | 84% | 80% | 52% | 71% | 45% | 11% | 75% | 64% |
| 2 | 68% | 72% | -14% | 58% | 4% | -65% | 72% | 46% |
| 3 | 66% | 73% | 18% | 67% | 41% | -3% | 70% | 57% |
| 4 | 82% | 82% | 64% | 71% | 53% | 9% | 72% | 65% |
| 5 | 27% | 65% | -169% | 50% | -8% | -69% | 59% | 33% |
| 6 | 90% | 86% | 68% | 64% | 36% | -13% | 81% | 62% |
| 7 | 84% | 74% | 56% | 56% | 32% | -10% | 68% | 50% |
| 8 | 75% | 68% | 14% | 64% | 22% | -35% | 67% | 52% |
| 9 | 72% | 65% | 25% | 68% | 4% | -61% | 59% | 54% |
| 10 | 70% | 63% | 31% | 76% | 24% | -32% | 61% | 63% |
| 11 | 84% | 81% | 56% | 71% | 46% | 9% | 79% | 65% |
| 12 | 85% | 83% | 38% | 68% | 18% | -42% | 80% | 59% |
| 13 | 90% | 88% | 65% | 80% | 51% | 9% | 81% | 74% |
| 14 | 63% | 73% | 4% | 63% | 3% | -60% | 68% | 49% |
| 15 | 86% | 64% | 57% | 65% | 60% | 31% | 61% | 61% |
| 16 | 82% | 78% | 31% | 70% | 32% | 4% | 78% | 61% |
| 17 | 81% | 79% | 46% | 63% | 24% | -35% | 72% | 54% |
| 18 | 85% | 86% | 53% | 82% | 59% | 30% | 90% | 76% |
| 19 | 88% | 81% | 54% | 74% | 59% | 29% | 81% | 69% |
| 20 | 76% | 66% | 11% | 68% | 43% | 9% | 77% | 58% |
| 21 | 58% | 75% | 7% | 59% | 16% | -43% | 68% | 47% |
| 22 | 82% | 70% | 56% | 69% | 52% | 18% | 75% | 62% |
| 23 | 77% | 74% | 30% | 58% | 45% | 4% | 70% | 52% |
| 24 | 78% | 74% | 30% | 61% | 37% | 8% | 69% | 53% |
| 25 | 80% | 59% | 5% | 53% | 32% | -12% | 54% | 43% |
| 26 | 90% | 83% | 76% | 73% | 55% | 22% | 77% | 69% |
| 27 | 90% | 76% | 66% | 79% | 64% | 40% | 85% | 74% |
